# Supplementary material for: Efficacy and Safety of Intravitreal Aflibercept Treat-and-Extend Regimens in Exudative Age-Related Macular Degeneration: 52- and 96-Week Findings from ALTAIR
Source: Springer Nature journal article supplement (doi:10.1007/s12325-020-01236-x), 2020-02-03
Supplement: MOESM1 [file 17620028]

### **16.1.3.1 List of IECs/IRBs**

#### **List of content:**

[List of IRB](#)

## List of IRB / 治験審査委員会一覧

Trial Description: Japanese Treat and Extend trial of VEGF-Trap Eye in AMD

Trial No: 17668

| No.   | 実施医療機関<br>Trial Center                                                                                 | 治験審査委員会の名称及び所在地<br>IRB Name and Address                                                                                                                                                      | 承認日<br>Date of Approval | 委員長の氏名<br>Chairperson | 備考<br>Remarks |
|-------|--------------------------------------------------------------------------------------------------------|----------------------------------------------------------------------------------------------------------------------------------------------------------------------------------------------|-------------------------|-----------------------|---------------|
| 20001 | 医療法人小沢眼科内科病院<br>眼科<br>Kozawa Eye Hospital and Diabetes Center<br>ophthalmology                         | 医療法人小沢眼科内科病院治験審査委員会<br>茨城県水戸市吉沢町 246-6<br>Kozawa Eye Hospital and Diabetes Center<br>Institutional Review Board<br>246-6 Yoshizawa-cho, Mito, Ibaraki                                        | 2014/11/11              | 安藤 幹彦                 |               |
| 20002 | 独立行政法人地域医療機能推進機構中京病院<br>眼科<br>Japan Community Healthcare Organization Chukyo Hospital<br>ophthalmology | 独立行政法人地域医療機能推進機構中京病院治験審査委員会<br>愛知県名古屋市中区三条 1-1-10<br>Japan Community Healthcare Organization Chukyo Hospital<br>Institutional Review Board<br>1-1-10 Sanjo minami-ku, Nagoya, Aichi          | 2014/11/27              | 露木 幹人                 |               |
| 20003 | 公立大学法人大阪市立大学医学部附属病院<br>眼科<br>Osaka City University Hospital<br>Department of Ophthalmology             | 大阪市立大学医学部附属病院臨床試験・治験審査委員会<br>大阪府大阪市阿倍野区旭町 1-5-7<br>Osaka City University Hospital<br>Institutional Review Board<br>1-5-7, Asahi-cho, Abeno-ku, Osaka                                         | 2014/11/26              | 白木 邦彦                 |               |
| 20004 | 社会医療法人秀眸会大塚眼科病院<br>眼科<br>Social care corporation Shuho-kai Otsuka Eye Hospital<br>ophthalmology        | 社会医療法人秀眸会大塚眼科病院治験審査委員会<br>北海道札幌市北区北 16 条西 4-2-17<br>Social care corporation Shuho-kai Otsuka Eye Hospital<br>Institutional Review Board<br>4-2-17, kita16jonishi, kita-ku, Sapporo, Hokkaido | 2014/12/25              | 松下 卓郎                 |               |
| 20005 | 公立大学法人横浜市立大学附属市民総合医療センター<br>眼科<br>Yokohama City University Medical Center<br>Ophthalmology             | 公立大学法人横浜市立大学附属市民総合医療センター臨床試験審査委員会<br>神奈川県横浜市南区浦舟町 4-57<br>Yokohama City University Medical Center<br>Institutional Review Board<br>4-57 Urafune-cho Minami-ku, Yokohama-shi, Kanagawa        | 2014/12/12              | 乾 健二                  |               |
| 20006 | 関西医科大学附属病院<br>眼科<br>Kansai Medical University Hospital<br>Department of Ophthalmology                  | 関西医科大学附属枚方病院治験審査委員会<br>大阪府枚方市新町 2-3-1<br>Kansai Medical University Hospital<br>Institutional Review Board<br>2-3-1 Shinmachi, Hirakata, Osaka                                                | 2014/12/15              | 日下 博文                 |               |

| No.   | 実施医療機関<br>Trial Center                                                                                    | 治験審査委員会の名称及び所在地<br>IRB Name and Address                                                                                                                                     | 承認日<br>Date of<br>Approval | 委員長の氏名<br>Chairperson | 備考<br>Remarks |
|-------|-----------------------------------------------------------------------------------------------------------|-----------------------------------------------------------------------------------------------------------------------------------------------------------------------------|----------------------------|-----------------------|---------------|
| 20007 | 国立大学法人山口大学医学部附属<br>病院<br>眼科<br><br>Yamaguchi University Hospital<br>Ophthalmology                         | 山口大学医学部附属病院治験及び人を<br>対象とする医学系研究等倫理審査委員会<br>山口県宇都部市南小串 1-1-1<br><br>Yamaguchi University Hospital<br>Institutional Review Board<br>1-1-1, Minamikogushi, Ube, Yamaguchi      | 2014/12/24                 | 神田 隆                  |               |
| 20008 | 福岡大学病院<br>眼科<br><br>Fukuoka University Hospital<br>Ophthalmology                                          | 福岡大学病院臨床研究審査委員会<br>福岡県福岡市城南区七隈 7-45-1<br><br>Fukuoka University Hospital<br>Institutional Review Board<br>7-45-1 Nanakuma, Jonan-ku, Fukuoka                                | 2014/12/17                 | 朔 啓二郎                 |               |
| 20009 | 医療法人明和会宮田眼科病院<br>眼科<br><br>Miyata Eye Hospital<br>Ophthalmology                                           | 宮田眼科病院治験審査委員会<br>宮崎県都城市蔵原町 6-3<br><br>Miyata Eye Hospital<br>Institutional Review Board<br>6-3 Kurahara-cho, Miyakonojo, Miyazaki                                           | 2014/12/17                 | 中原 正彰                 |               |
| 20010 | 東京医科大学病院<br>眼科<br><br>Tokyo Medical University Hospital<br>Ophthalmology                                  | 東京医科大学病院治験審査委員会<br>東京都新宿区西新宿 6-7-1<br><br>Tokyo Medical University Hospital<br>Institutional Review Board<br>6-7-1 Nishi-shinjuku, Shinjuku-ku, Tokyo                       | 2015/1/19                  | 羽生 春夫                 |               |
| 20011 | 東邦大学医療センター佐倉病院<br>眼科<br><br>Toho University Sakura Medical<br>Center<br>Ophthalmology                     | 東邦大学医療センター佐倉病院治験審査<br>委員会<br>千葉県佐倉市下志津 564-1<br><br>Toho University Sakura Medical Center<br>Institutional Review Board<br>564-1 Shimoshizu, Sakura, Chiba                  | 2015/1/9                   | 鈴木 康夫                 |               |
| 20012 | 公立大学法人名古屋市立大学病院<br>眼科 Nagoya City University<br>Hospital Ophthalmology                                    | 名古屋市立大学病院医薬品等臨床試験<br>審査委員会<br>愛知県名古屋市瑞穂区瑞穂町字川澄<br><br>1Nagoya City University<br>Hospital Institutional Review Board 1<br>Kawasumi, Mizuho-cho, Mizuho-ku,<br>Nagoya, Aichi | 2015/2/4                   | 齋藤 伸治                 |               |
| 20013 | 藤田保健衛生大学病院<br>眼科<br><br>Fujita Health University Hospital<br>Ophthalmology                                | 藤田保健衛生大学病院治験審査委員会<br>愛知県豊明市沓掛町田楽ヶ窪 1-98<br><br>Fujita Health University Hospital<br>Institutional Review Board<br>1-98 Dengakugakubo Kutsukake-cho,<br>Toyoake, Aichi       | 2015/2/19                  | 吉岡 健太郎                |               |
| 20014 | 滋賀医科大学医学部附属病院<br>眼科<br><br>Shiga University of Medical Science<br>Hospital<br>Department of Ophthalmology | 滋賀医科大学医学部附属病院治験審査<br>委員会<br>滋賀県大津市瀬田月輪町<br><br>Shiga University of Medical Science<br>Hospital<br>Institutional Review Board<br>Setatsukinowa-cho, Otsu, Shiga              | 2015/3/25                  | 寺田 智祐                 |               |

| No.   | 実施医療機関<br>Trial Center                                                                                                        | 治験審査委員会の名称及び所在地<br>IRB Name and Address                                                                                                                                                                     | 承認日<br>Date of<br>Approval | 委員長の氏名<br>Chairperson | 備考<br>Remarks |
|-------|-------------------------------------------------------------------------------------------------------------------------------|-------------------------------------------------------------------------------------------------------------------------------------------------------------------------------------------------------------|----------------------------|-----------------------|---------------|
| 20015 | 関西医科大学総合医療センター<br>眼科<br>Kansai Medical University Medical<br>Center<br>Department of Ophthalmology                            | 関西医科大学附属滝井病院治験審査委<br>員会<br>大阪府守口市文園町 10-15<br>Kansai Medical University Medical Center<br>Institutional Review Board<br>10-15 Fumizono-cho, Moriguchi, Osaka                                                | 2015/1/20                  | 關 壽人                  |               |
| 20016 | 国立大学法人宮崎大学医学部附属<br>病院<br>眼科<br>University of Miyazaki Hospital<br>Ophthalmology                                               | 国立大学法人宮崎大学医学部附属病院<br>治験審査委員会<br>宮崎県宮崎市清武町木原 5200<br>University of Miyazaki Hospital<br>Institutional Review Board<br>5200 Kihara Kiyotake-cho, Miyazaki                                                     | 2015/2/23                  | 柳田 俊彦                 |               |
| 20018 | 地方独立行政法人神戸市民病院機<br>構神戸市立医療センター中央市民病<br>院<br>眼科<br>Kobe City Medical Center General<br>Hospital<br>Department of Ophthalmology | 地方独立行政法人神戸市民病院機構神<br>戸市立医療センター中央市民病院治験審<br>査委員会<br>兵庫県神戸市中央区港島南町 2-1-1<br>Kobe City Medical Center General<br>Hospital<br>Institutional Review Board<br>2-1-1 Minatojimaminamimachi Chuo-ku,<br>Kobe, Hyogo | 2015/1/19                  | 北 徹                   |               |
| 20019 | 岩手医科大学附属病院<br>眼科<br>Iwate Medical University Hospital<br>Ophthalmology                                                        | 岩手医科大学治験審査委員会<br>岩手県盛岡市内丸 19-1<br>Iwate Medical University Hospital<br>Institutional Review Board<br>19-1 Uchimaruru, Morioka, Iwate                                                                        | 2015/3/19                  | 杉山 徹                  |               |
| 20020 | 一般財団法人脳神経疾患研究所附<br>属南東北眼科クリニック<br>眼科<br>Southern Tohoku Ophthalmic Clinic<br>Department of Ophthalmology                      | (一財)脳神経疾患研究所附属総合南東北<br>病院治験審査委員会<br>福島県郡山市八山田 7-115<br>General Southern Tohoku Hospital<br>Institutional Review Board<br>7-115 Yatsuyamada, Koriyama, Fukushima                                             | 2015/2/28                  | 鹿山 悟                  |               |
| 20021 | 医療法人社団ひかり会木村眼科内科<br>病院<br>眼科<br>Kimura Eye and Internal Medicine<br>Hospital<br>Ophthalmology                                 | 医療法人社団ひかり会木村眼科内科病院<br>治験審査委員会<br>広島県呉市宝町 3-15<br>Kimura Eye and Internal Medicine Hospital<br>Institutional Review Board<br>3-15 Takaramachi, Kure, Hiroshima                                               | 2015/2/24                  | 木村 治                  |               |
| 20022 | 国立大学法人高知大学医学部附属<br>病院<br>眼科<br>Kochi Medical School Hospital<br>Ophthalmology                                                 | 高知大学医学部附属病院治験審査委員<br>会<br>高知県南国市岡豊町小蓮 185-1<br>Kochi Medical School Hospital<br>Institutional Review Board<br>185-1 Kohasu Oko-cho, Nankoku, Kochi                                                          | 2015/4/28                  | 宮村 充彦                 |               |
| 20023 | 東京女子医科大学病院<br>眼科<br>Tokyo Women's Medical University<br>Hospital<br>Ophthalmology                                             | 東京女子医科大学治験審査委員会<br>東京都新宿区河田町 8 番 1 号<br>Tokyo Women's Med. Univ. HP. IRB<br>8-1 Kawadacho<br>, Shinjuku-ku, Tokyo                                                                                           | 2015/3/13                  | 石郷岡 純                 |               |

| No.   | 実施医療機関<br>Trial Center                                                                                  | 治験審査委員会の名称及び所在地<br>IRB Name and Address                                                                                                                                                                | 承認日<br>Date of<br>Approval | 委員長の氏名<br>Chairperson | 備考<br>Remarks |
|-------|---------------------------------------------------------------------------------------------------------|--------------------------------------------------------------------------------------------------------------------------------------------------------------------------------------------------------|----------------------------|-----------------------|---------------|
| 20024 | 東京医科大学八王子医療センター<br>眼科<br>Tokyo Medical University Hachioji<br>Medical CenterOphthalmology               | 東京医科大学八王子医療センター治験審<br>査委員会東京都八王子市館町<br>1163Tokyo Medical University Hachioji<br>Medical CenterInstitutional Review<br>Board1163 Tatemachi, Hachioji, Tokyo                                             | 2015/3/27                  | 池田 寿昭                 |               |
| 20025 | 医療法人社団彩光会札幌かとう眼科<br>眼科<br>Sapporo Katoh Ophthalmology Clinic<br>Ophthalmology                           | 社会医療法人秀眸会大塚眼科病院治験<br>審査委員会<br>北海道札幌市北区北 16 条西 4-2-17<br>Social care corporation Shuho-kai Otsuka<br>Eye Hospital<br>Institutional Review Board<br>4-2-17, kita16jonishi, kita-ku, Sapporo,<br>Hokkaido | 2015/2/26                  | 松下 卓郎                 |               |
| 20026 | 東京医科大学茨城医療センター<br>眼科<br>Tokyo Medical University Ibaraki<br>Medical Center<br>Ophthalmology             | 東京医科大学茨城医療センター医薬品治<br>験臨床試験審査委員会<br>茨城県稲敷郡阿見町中央 3-20-1<br>Tokyo Medical University Ibaraki Medical<br>Center<br>Institutional Review Board<br>3-20-1 Amimachi Chuo, Inashiki-gun,<br>Ibaraki           | 2015/4/13                  | 大久保 信司                |               |
| 20027 | 杏林大学医学部付属病院<br>眼科<br>Kyorin University Hospital<br>Department of Ophthalmology                          | 杏林大学医学部付属病院治験審査委員<br>会<br>東京都三鷹市新川 6-20-2<br>Kyorin University Hospital<br>Institutional Review Board<br>6-20-2 Shinkawa, Mitaka, Tokyo                                                                | 2015/7/8                   | 楊 國昌                  |               |
| 20028 | 日本大学病院<br>眼科<br>Nihon University Hospital<br>Department of Ophthalmology                                | 日本大学附属病院共同治験審査委員会<br>東京都板橋区大谷口上町 30-1<br>Nihon University Hospital<br>30-1 Oyaguchikami-cho<br>, Itabashi-ku                                                                                           | 2015/4/28                  | 橋本 修                  |               |
| 20029 | 国立大学法人山梨大学医学部附属<br>病院<br>眼科<br>University of Yamanashi Hospital<br>Ophthalmology                        | 山梨大学医学部附属病院医薬品等臨床<br>研究審査委員会<br>山梨県中央市下河東 1110<br>University of Yamanashi Hospital<br>University of Yamanashi HP IRB<br>1110, Shimogato Higashi, Chuo,<br>Yamanashi                                    | 2015/5/20                  | 増山 敬祐                 |               |
| 20030 | 社会医療法人大雄会大雄会クリニック<br>眼科<br>Daiyukai Health System Daiyukai<br>Clinic<br>The department of Ophthalmology | 特定非営利活動法人臨床研究の倫理を<br>考える会治験審査委員会<br>東京都千代田区一番町 13-2<br>Clinical study Ethics<br>Institutional Review Board<br>13-2 Ichiban-cho, Chiyoda, Tokyo                                                         | 2015/4/27                  | 馬杉 則彦                 |               |
| 20031 | 高槻赤十字病院<br>眼科<br>Takatsuki Red Cross Hospital<br>Ophthalmology                                          | 高槻赤十字病院治験審査委員会<br>大阪府高槻市阿武野 1-1-1<br>Takatsuki Red Cross Hospital<br>Institutional Review Board<br>1-1-1 Abuno, Takatsuki, Osaka                                                                       | 2015/4/17                  | 平松 昌子                 |               |

| No.   | 実施医療機関<br>Trial Center                                                                                     | 治験審査委員会の名称及び所在地<br>IRB Name and Address                                                                                                                                       | 承認日<br>Date of<br>Approval | 委員長の氏名<br>Chairperson | 備考<br>Remarks |
|-------|------------------------------------------------------------------------------------------------------------|-------------------------------------------------------------------------------------------------------------------------------------------------------------------------------|----------------------------|-----------------------|---------------|
| 20032 | 宗教法人在日本南プレスビテリアン<br>ミッション淀川キリスト教病院<br>眼科<br>Yodogawa Christian Hospital<br>The department of Ophthalmology | 宗教法人在日本南プレスビテリアンミ<br>ッション淀川キリスト教病院治験審査委員会<br>大阪府大阪市東淀川区柴島 1-7-50<br>Yodogawa Christian Hospital<br>Institutional Review Board<br>1-7-50 Kuniyama Higashiyodogawa-ku,<br>Osaka | 2015/4/8                   | 重岡 靖                  |               |
| 20033 | 近畿大学医学部附属病院<br>眼科<br>Kindai University Hospital<br>Ophthalmology                                           | 近畿大学医学部附属病院治験審査委員<br>会<br>大阪府大阪狭山市大野東 377-2<br>Kindai University Hospital<br>Institutional Review Board<br>377-2, Ohnohigashi, Osakasayama-shi,<br>Osaka                      | 2015/4/21                  | 池上 博司                 |               |
| 20034 | 医療法人竹内眼科竹内眼科クリニッ<br>ク<br>眼科<br>Takeuchi ophthalmology Clinic<br>Ophthalmology                              | 新赤坂クリニック治験審査委員会<br>東京都港区六本木 5-5-1<br>Shin Akasaka Clinic<br>Institutional Review Board<br>5-5-1 Roppongi, Minato-ku, Tokyo                                                    | 2015/3/26                  | 小宮山 寛機                |               |
| 20035 | 聖路加国際病院眼科 St.Luke's<br>International Hospital Ophthalmology                                                | 聖路加国際病院治験審査委員会東京都<br>中央区明石町9-1 St.Luke's International<br>Hospital Institutional Review Board 9-1<br>Akashi-cho, Chuoku, Tokyo                                                | 2015/5/13                  | 衛藤 光                  |               |
| 20036 | 独立行政法人地域医療機能推進機<br>構下関医療センター<br>眼科<br>JCHO Shimonoseki Medical Center<br>The department of Ophthalmology   | 独立行政法人地域医療機能推進機構下<br>関医療センター治験審査委員会<br>山口県下関市上新地町 3-3-8<br>JCHO Shimonoseki Medical Center<br>Institutional Review Board<br>3-3-8 Kamishinchi-cho, Shimonoseki,<br>Yamaguchi  | 2015/4/24                  | 安藤 彰                  |               |
| 20037 | 地方独立行政法人総合病院国保旭<br>中央病院<br>眼科<br>Asahi General Hospital<br>The department of Ophthalmology                 | 総合病院国保旭中央病院治験審査委員<br>会<br>千葉県旭市イ 1326<br>Asahi General Hospital<br>Asahi Central Hospital IRB<br>1326, I, Asahi, Chiba                                                        | 2015/5/8                   | 渡辺 三郎                 |               |
| 20038 | 飯田市立病院<br>眼科<br>Iida Municipal Hospital<br>The department of Ophthalmology                                 | 特定非営利活動法人臨床研究の倫理を<br>考える会治験審査委員会<br>東京都千代田区一番町 13-2<br>Clinical study Ethics<br>Institutional Review Board<br>13-2 Ichiban-cho, Chiyoda, Tokyo                                | 2015/4/27                  | 馬杉 則彦                 |               |
| 20039 | 医療法人社団桑園むねやす眼科<br>眼科<br>Soen-Muneyasu Eye Clinic<br>The department of ophthalmology                        | 医療法人社団恒正会そねクリニック治験<br>審査委員会<br>東京都新宿区新宿 3-32-8<br>Sone Clinic<br>Institutional Review Board<br>3-32-8 Shinjuku, Shinjuku-ku, Tokyo                                            | 2015/5/14                  | 加藤 武男                 |               |

| No.   | 実施医療機関<br>Trial Center                                                          | 治験審査委員会の名称及び所在地<br>IRB Name and Address                                                                                                          | 承認日<br>Date of<br>Approval | 委員長の氏名<br>Chairperson | 備考<br>Remarks |
|-------|---------------------------------------------------------------------------------|--------------------------------------------------------------------------------------------------------------------------------------------------|----------------------------|-----------------------|---------------|
| 20040 | 国立大学法人信州大学医学部附属<br>病院<br>眼科<br><br>Shinshu University Hospital<br>Ophthalmology | 国立大学法人信州大学医学部附属病院<br>治験審査委員会<br>長野県松本市旭 3-1-1<br><br>Shinshu University Hospital<br>Institutional Review Board<br>3-1-1 Asahi, Matsumoto, Nagano | 2015/6/24                  | 伊藤 研一                 |               |
| 20041 | 岡山大学病院<br>眼科<br><br>Okayama University Hospital<br>Ophthalmology                | 岡山大学病院治験審査委員会<br>岡山県岡山市北区鹿田町 2-5-1<br><br>Okayama University Hospital<br>Institutional Review Board<br>2-5-1, Shikata-machi Kita-ku, Okayama     | 2015/7/23                  | 柳井 広之                 |               |
| 20042 | 九州大学病院<br>眼科<br><br>Kyushu University Hospital<br>Department of Ophthalmology   | 九州大学病院治験倫理審査委員会<br>福岡県福岡市東区馬出 3-1-1<br><br>Kyushu University Hospital<br>Institutional Review Board<br>3-1-1, Maidashi, Higashi-ku, Fukuoka      | 2015/7/2                   | 増田 智先                 |               |
